# Supplementary material for: Bacteria-mediated tumor immunotherapy via photothermally-programmed PD1 expression
Source: Royal Society of Chemistry journal article supplement (doi:10.1039/d1na00857a), 2022-01-01
Supplement: d1na00857a1.pdf [file d1na00857a1.pdf]

## **Bacteria-mediated tumor immunotherapy via photothermally-programmed PD1 expression**

Wenxuan Xu,<sup>1,‡</sup> Debao Ren,<sup>1,‡</sup> Zimeng Yu,<sup>1</sup> Jia Hou,<sup>1</sup> Fan Huang,<sup>1</sup> Tingfang Gan,<sup>1</sup>

Ping Ji,<sup>2</sup> Cheng Zhang,<sup>1</sup> Lixin Ma<sup>1,\*</sup> Yunhong Hu<sup>1,\*</sup>

<sup>1</sup>State Key Laboratory of Biocatalysis and Enzyme Engineering, Hubei Key Laboratory of Industrial Biotechnology, School of Life Sciences, Hubei University, Wuhan 430062, P.R. China

<sup>2</sup>Department of Chemistry, Wuhan University, Wuhan, 430072, P.R. China

<sup>‡</sup>These authors contributed equally to this work

\*Corresponding author E-mail: malixing@hubu.edu.cn; huyunhong@hubu.edu.cn

**Table S1.** Bacterial strains used in this study

| Bacteria strain | Plasmid               | Use                                 |
|-----------------|-----------------------|-------------------------------------|
| Gold            | pBV220/ClyA-mPD1E-3HA | Consteuction of recombinant plasmid |
| MG1655          | pBV220/ClyA-mPD1E-3HA | Expression of PD1                   |

**Table S2.** Primers used to constructed pBV220/ClyA-mPD1E-3HA

| Number | Name         | Sequence (5' to 3')                             |
|--------|--------------|-------------------------------------------------|
| 1      | ePD1-5'EcoRI | TTAAAAATTAAGGAGGAATTCATGACTGAAATCGTT<br>GCAGA   |
| 2      | ePD1-3'Sall  | ACAGAAGCTTGGCTGCAGGTCGACTTAGGCATAGT<br>CGGGGACA |

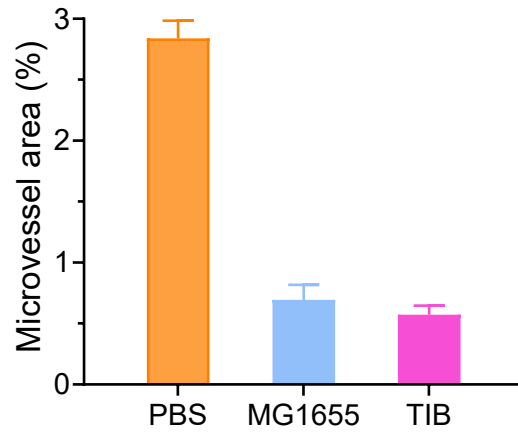

**Fig S1** Statistical of tumor microvascular area of mice treated with different strategies.

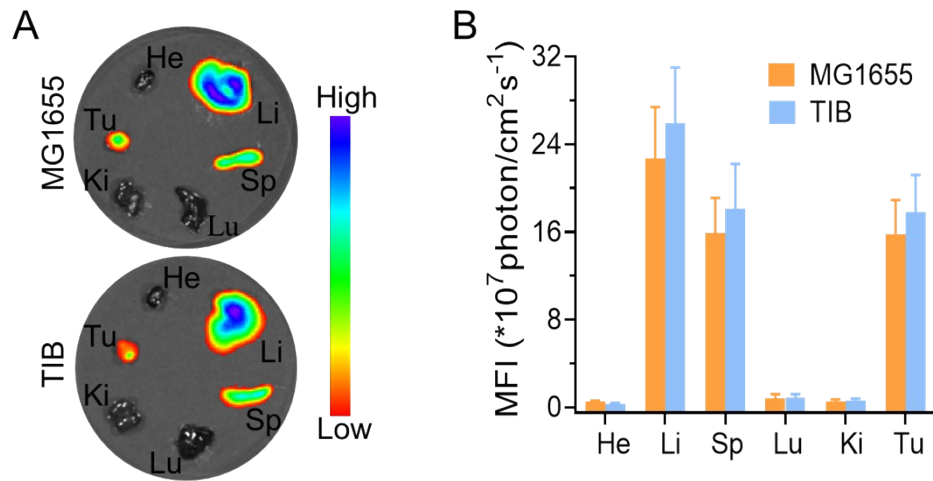

**Fig S2** (A) Fluorescence imaging of individual tissues after inoculation of bacteria in tail vein for 24 h (He-heart, Li-liver; Sp-spleen, Lu-lung, Ki-kidney, and Tu-tumor). B) Corresponding MFI of isolated organs with tumor tissue.

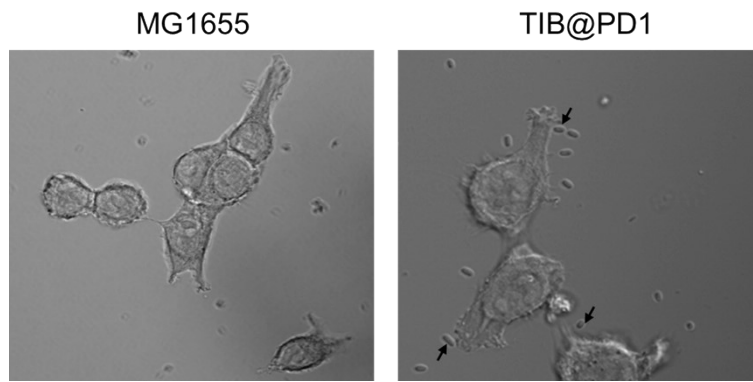

**Fig S3** Bacterial TIB@PD1 combine with CT26 tumor cells.

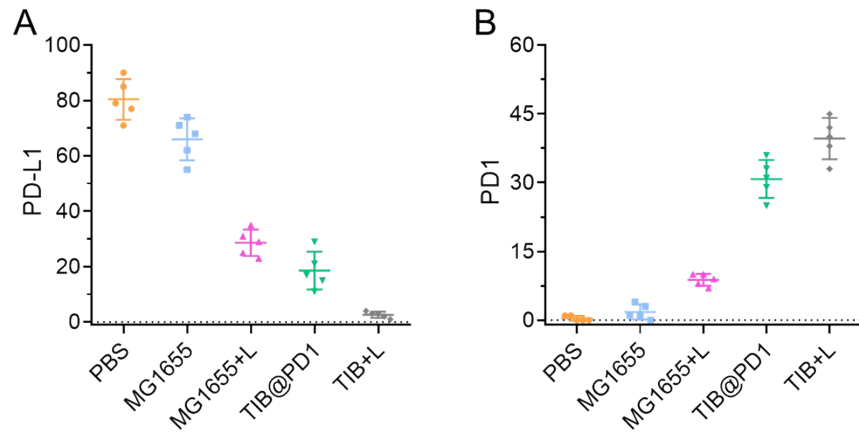

**Fig S4** (A) The number of PD-L1 labeled cells at tumor site per field. (B) The number of PD1 labeled cells at tumor site per field.

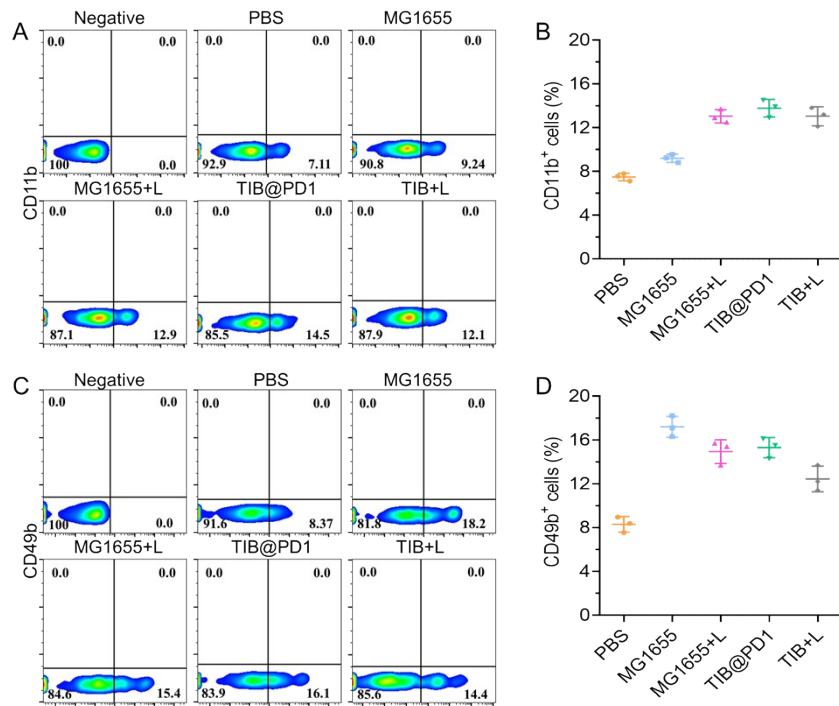

**Fig S5** (A) Flow cytometry showing the distribution of CD11b<sup>+</sup> cells in the CT26 tumor-bearing mouse blood. (B) The corresponding quantitative analysis of the CD11b<sup>+</sup> cells data. (C) Flow cytometry showing the distribution of CD49b<sup>+</sup> cells in the CT26 tumor-bearing mouse blood. (D) The corresponding quantitative analysis of the CD49b<sup>+</sup> cells data.



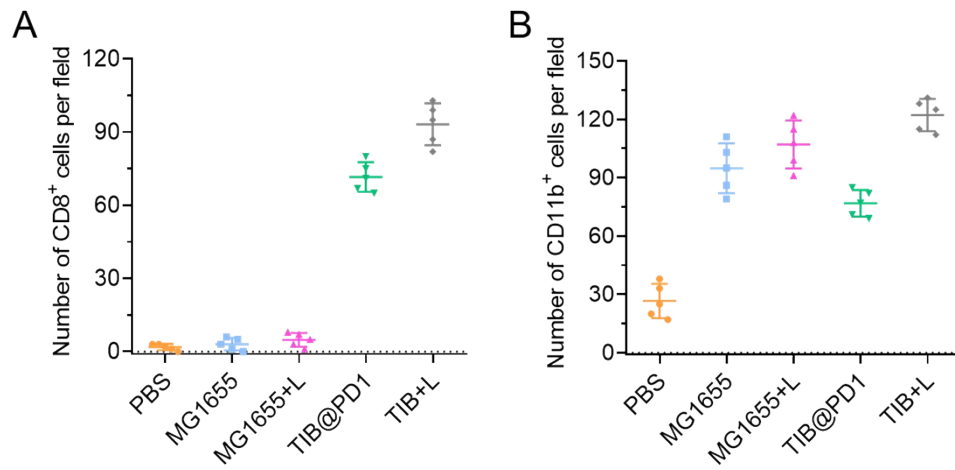

**Fig S6** (A) Number of CD8<sup>+</sup> T cells at tumor site per field. (B) Number of CD11b<sup>+</sup> cells at tumor site per field.

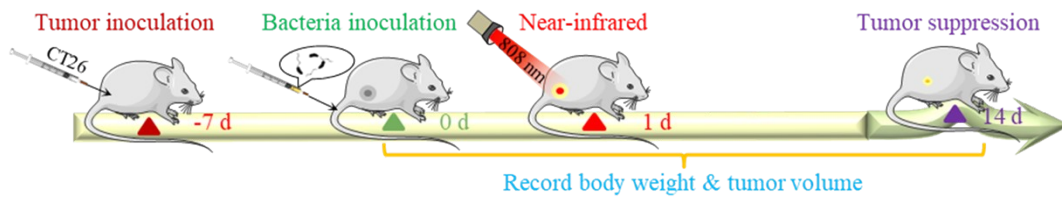

**Fig S7** Treatment schedule of CT26 tumor-bearing mice by using bacteria and NIR irradiation.

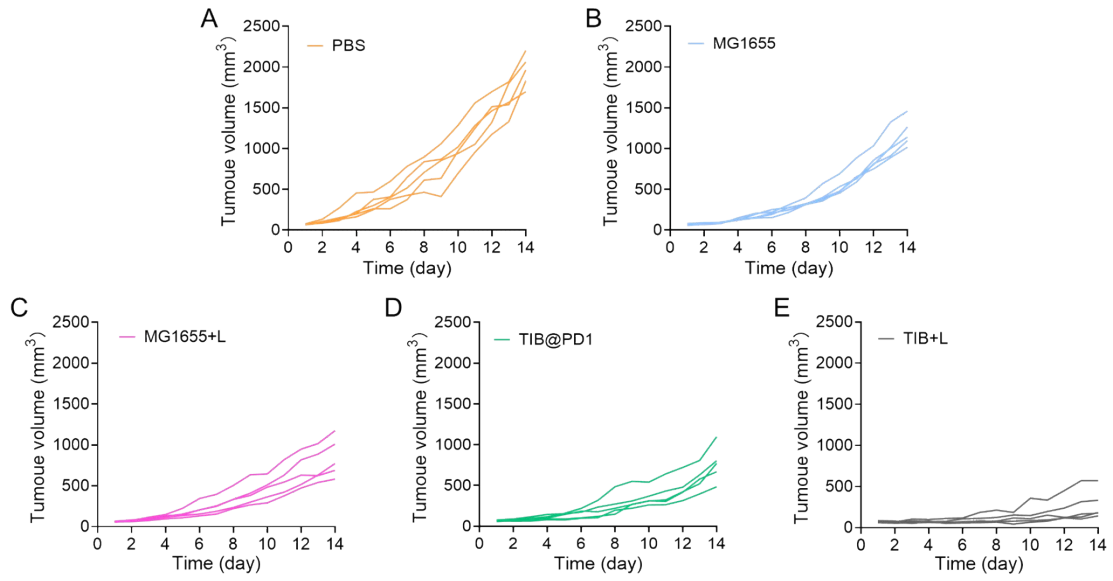

**Fig S8** Growth curves of subcutaneously implanted CT26 tumors following treatment with PBS, MG1655, MG1655+L, TIB@PD1, and TIB+L.

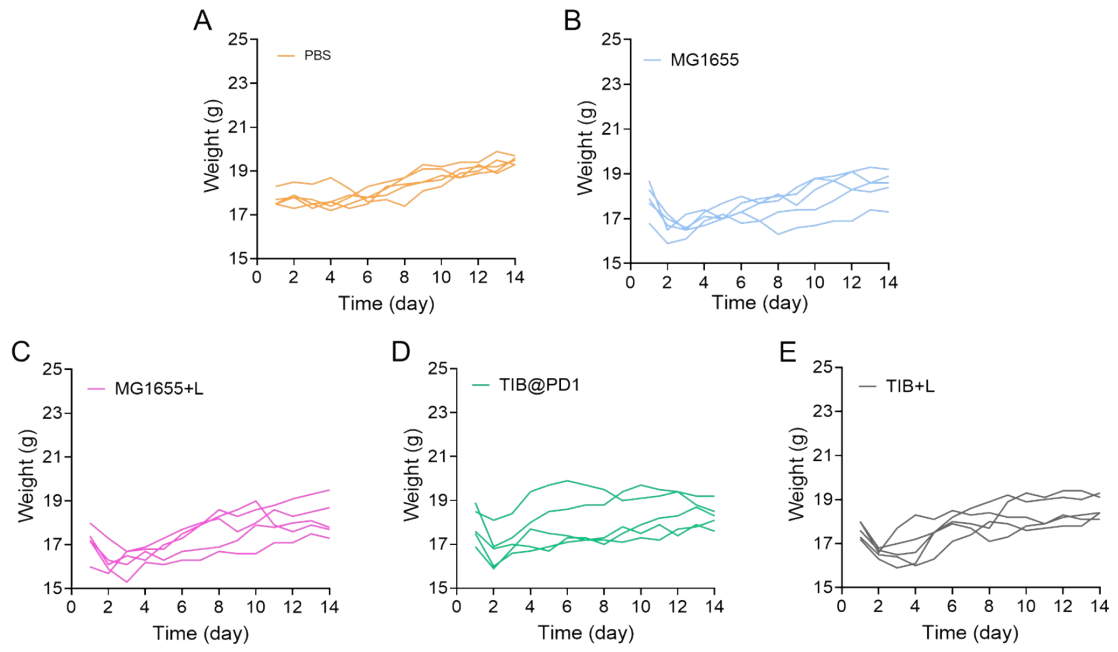

**Fig S9** The weight of mice in each group following treatment with PBS, MG1655, MG1655+L, TIB@PD1, and TIB+L.

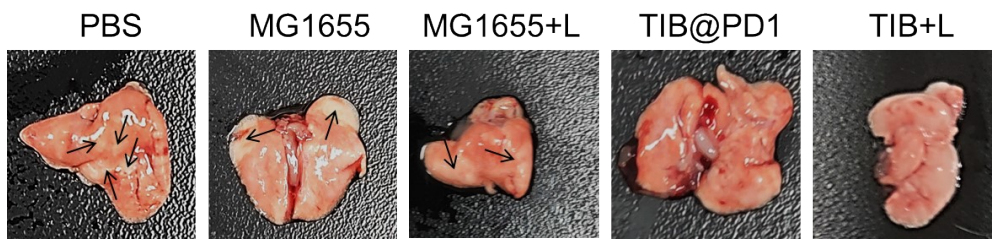

**Fig S10** Physical image of the lung of CT26 tumor-bearing mice, arrow shows lung metastasis.

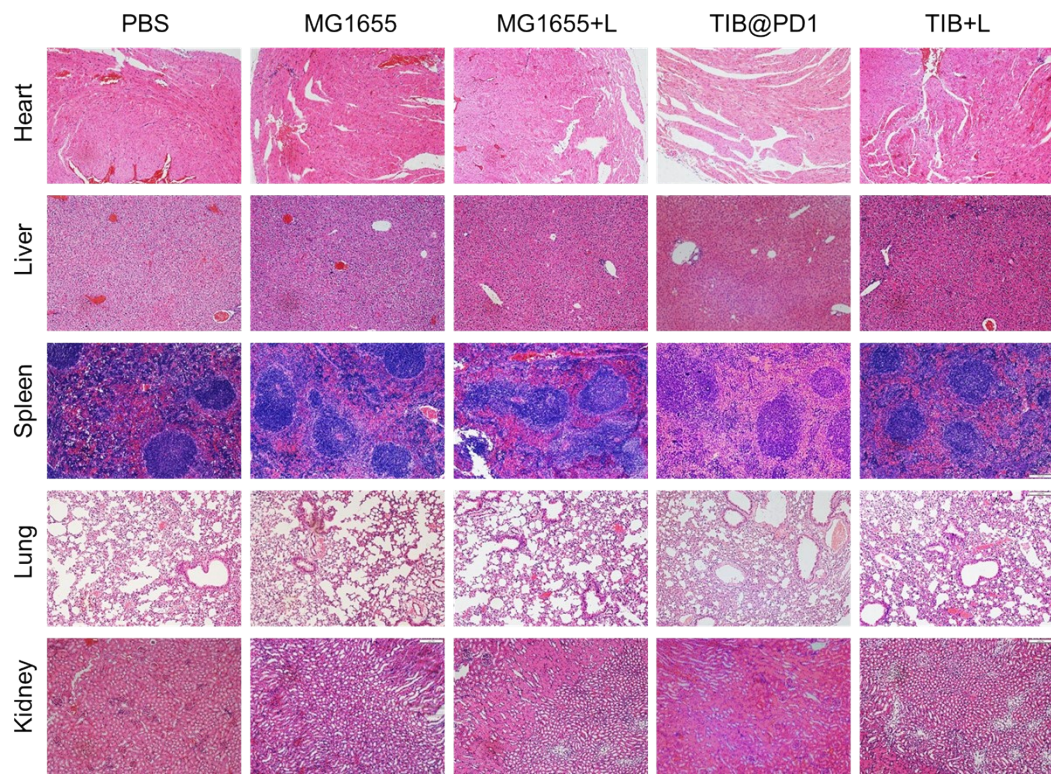

**Fig S11** Representative H&E for main organs at the end of the experiments.
